# Supplementary material for: Analysis of Sogatella furcifera proteome that interact with P10 protein of Southern rice black-streaked dwarf virus
Source: PubMed Central journal article supplement (PMC5032029; doi:10.1038/srep32445), 2016-09-22

## Supporting Information for

***Analysis of *Sogatella furcifera* proteome that interact with P10 protein of *Southern rice black-streaked dwarf virus****

Win Than\*, Faliang Qin\*, Wenwen Liu, Xifeng Wang\*\*

State Key Laboratory for Biology of Plant Diseases and Insect Pests, Institute of Plant Protection, Chinese Academy of Agricultural Sciences, Beijing 100193, China

\*These authors contributed equally to this work.

\*\*Corresponding author: [xfwang@ippcaas.cn](mailto:xfwang@ippcaas.cn)

**Supplemental Table-S1: Complete nucleotide sequence for each gene**

| Name                                                                                                                                                                                                                      | Complete nucleotide sequence                                                                                                                                                                                                                                                                                                                                                                                                                                                                                                                                                                                                                                                                                                                                                                                                                                                                                                                                                                                                                                                                                                                                                                                                                                                                                                                                                                                                                                            |
|---------------------------------------------------------------------------------------------------------------------------------------------------------------------------------------------------------------------------|-------------------------------------------------------------------------------------------------------------------------------------------------------------------------------------------------------------------------------------------------------------------------------------------------------------------------------------------------------------------------------------------------------------------------------------------------------------------------------------------------------------------------------------------------------------------------------------------------------------------------------------------------------------------------------------------------------------------------------------------------------------------------------------------------------------------------------------------------------------------------------------------------------------------------------------------------------------------------------------------------------------------------------------------------------------------------------------------------------------------------------------------------------------------------------------------------------------------------------------------------------------------------------------------------------------------------------------------------------------------------------------------------------------------------------------------------------------------------|
| <p><b>Vesicle-associated membrane protein 7</b></p> <p>5' untranslated region [32 bp]</p> <p>CDS (33 bp-683 bp) [651 bp]</p> <p>3' untranslated region [693 bp]</p> <p>Poly (A) tail [29 bp]</p> <p>Total [1405 bp]</p>   | <p>atctcacttccattgattaatcgaataaaaatgcttatcctatacagtgtagtgcaagagggaccacgggtctggcaaaattgcaacatgcgctggaattt<br/> tccgaggtgacagaacaatcctggcgaaaattggccagaaaacaggaggaagactctctcacagtagctatttattccattacatgatgaggacag<br/> aattgtttacatgtgtattgcggatgatgagttgaacgaccaagagcgttttatacttgaatgaaataaaaaagaggtccggtcaacatattggcagcagag<br/> ctgacacggccattgcttatgccatgaactcagagttggcctatfftaggaaatgaaatgaaatactattcagaatcgaaggatattgacacaattcacga<br/> gtacatggcgaattggatgaattgaaagataatggttcacaatattgataacattgctatgagagatgaacgcctcgaattgctggtgataaaacagaaa<br/> atctaacagccagctctgtcacattccgagcaactagtagaaattfacagcgactctctctggaaaaatgaaactctatatgataatctcagctattgttt<br/> ggtaataattttcatcttagctatgtctgtggatcgactttgtccagtgtgaaagactacagagtaacaatcacctgtacgggttaattataatccgatga<br/> ttcttcagtaaagagtcttctgtgatattgcaatgataaatttatactattcttaagtagcatgtaaacataagctacggfactgtatttttatttattccttat<br/> ttcacgggtcaattaatcaccagaaattttgaaataccaatcatattcttaattattatccataaacaatggtaatgtgactgtatccactgtattaaataat<br/> agattgcaataaattcaattaagattttactgcagtttgagtaatacaaaatagatccgtttatattagttgtttatatttaccagattgtttattgtcagag<br/> aagtgaacattgtattgcataaggaatgtatgatagatacctatgaagatattttgaaattattcttttctgataaatattatgtcataaacaagggaat<br/> gtaaatgtattgtaatccactgttttagatcatagattgtaataaattctattgaagtacggtttttagattgcagtttcagtaatacaaaaatagaaccgtttttatt<br/> agttgcataaattgaaataatatttctataaaaatattgtttattatcggagaattgaacaatttttgcataatgaaataaaaaaaaaaaaaaaaaaaaa<br/> aaaaaaaa</p> |
| <p><b>Vesicle transport V-SNARE protein Vtila</b></p> <p>5' untranslated region [54 bp]</p> <p>CDS (55 bp-723 bp) [669 bp]</p> <p>3' untranslated region [952 bp]</p> <p>Poly (A) tail [30 bp]</p> <p>Total [1705 bp]</p> | <p>aatgaaaaattattaataagttcaactaatttagtagcctaaacattagattatggctgcttaattgatgtttatgagcagcaaatatgcagtcacacagcag<br/> atgttactcaagattggaagattatcatctcttctggaggagaacgacgtcatgttattcggattggataagctgtttgatgaagccaaagagcttatgg<br/> aacaatgggccttgaagttcacgagttgaaatcagcagatcaatcaaaacttaagaacagaattgaaagtataagcagaactgaaagactagaaca<br/> agaattactaatgctaaaaagaatatcaactcaaaaatggctacagcgataggatagaactgtatagcgaagataagcgtcaatgaggaacagaag<br/> caaaggctttggacaatgctgaaatggttgagcgcactggcaagaaattgactgctggctatcaagtgttttggagactgaagatattggcaatcaagttc<br/> tcagggacttgcattcgcagagggaacgatacagaaatcgaggtctaggttaagagaacaacgccgagctgggaagaagtaacagaatcatcaatt<br/> cgatgatcaacagatctctgcaacacaggtcatcttgacagctatgccatcgtgttctgccttggtcgtgatcagcatctacatcagctactcgtctc<br/> gataaactgcacttgtcaccatttagtactctactcgggtgatttccatcattctataaataaataatttattcactgctctagatgaaataaactaactatcatt<br/> gaattgaactatcactgttgaacaacacactagtaattattaattgtgtaaaagacaaggactcaatagctgtctgcctctctccgttataataaataatga<br/> tctaataaaggattatctcatgctcaatataatgggtatcgtatgtgactatgattcttgatcagattttgaaatgcattcatattttctagaataaacttacgt<br/> ctatcattgcacagatattgtactaattcataactcacatcattgtttatcattttagatattttaaagctgattgtgacttaattgtaacgaagatcattctgga<br/> gctataaaacttgagttattccaatatcttaattgctattgcaagaaatgttattgtttgtatgctgaatctattaacgatagaatctatgaaaagttggat</p>                                                                                                                                    |

|                                                                                                                                                                                                                                   |                                                                                                                                                                                                                                                                                                                                                                                                                                                                                                                                                                                                                                                                                                                                                                                                                                                                                                                                                                                                                                                                                                                                                                                                                                                                                                                                                                                                                                                                                        |
|-----------------------------------------------------------------------------------------------------------------------------------------------------------------------------------------------------------------------------------|----------------------------------------------------------------------------------------------------------------------------------------------------------------------------------------------------------------------------------------------------------------------------------------------------------------------------------------------------------------------------------------------------------------------------------------------------------------------------------------------------------------------------------------------------------------------------------------------------------------------------------------------------------------------------------------------------------------------------------------------------------------------------------------------------------------------------------------------------------------------------------------------------------------------------------------------------------------------------------------------------------------------------------------------------------------------------------------------------------------------------------------------------------------------------------------------------------------------------------------------------------------------------------------------------------------------------------------------------------------------------------------------------------------------------------------------------------------------------------------|
|                                                                                                                                                                                                                                   | <p>gcttttggatgtaaataatagtaaataagctagagtaataatcaattatctgaaatfaacttgagttcaataaggatggatagatgatgcgtaagt<br/> atggctagatggatgataatagatggatagatggctagtaagtttttgtttatggtcctatacaaaaacttaattaattgatatctgattgaaactgctaatt<br/> tattctatataccctcgattgattcatgatgcaaatatftccaattattactgaaagtactcatattctactcactgtctgtgaaaaaattgagaattgcat<br/> tttaatgtcttttggagttgaaatattcatgtgtaacttattgtaaataaaaataatgtctcattattgtcgaiaaaaaaaaaaaaaaaaaaaaaaa<br/> aa</p>                                                                                                                                                                                                                                                                                                                                                                                                                                                                                                                                                                                                                                                                                                                                                                                                                                                                                                                                                                                                                                        |
| <p><b>Growth hormone-inducible<br/>transmembrane protein</b><br/> 5' untranslated region [57 bp]<br/> CDS (58 bp-1083 bp) [1026 bp]<br/> 3' untranslated region [297 bp]<br/> Poly (A) tail [30 bp]<br/> Total [1410 bp]</p>      | <p>tcatctaggcctactgtcagctattggaatacactttctagaactaactctgatgatgttggcctcacgactttgtagcttgcacctagcaccactcggaagg<br/> acatctattatccgagtggtgcacaaacagtaagctgccttcgacaaaaagcacaagcaatgaactgttcgactctacagcaaccaggggcagaggatcatg<br/> gtctagggcatctcctcgtagacgtaccatcaaggaaatcgccatgcaaccagcatctggcacagctttcaacgttggcacagcagcagtgccggggcg<br/> agcagctgtcggaatcggtgctgtgtctctacggattgggcttggcatcaaacctggcgcctatggatcagtcattgatgtgcccagatgtgaagg<br/> aaagaatcagatcaacctatattttggatcatcagtggtctcacagcagccagtgcttacgcttctcaattcaccagtcattgaaattgatgatga<br/> agaactcttaattgcaattgcatgattggctgcgatattggtacatcggtattgtaggagcattccttacacagaaggctttgattgaagcaggcc<br/> gcctgggctctgcacaccagtgcataggagcagtcacgcgccatctgttcgtaggagggccatcctagtagctgcttggtagcagccggcggt<br/> agtgggtgggctgtcgttgggtgctgcttgcgacccagcgaacagttcctgaacatggcggggcgcctcagcatggcctggcggtagtgttgcgc<br/> ctcctcggctctgtctttatgccccaccaccgactcggctccgactctactccatcagcctttacggcggcctgctcctattctccggatttctgctta<br/> cgacacgcagaagatcatcaagagtccgaaactcattgccttacgccatggagaatacagatccgatcaacatgtctatgggcatctacatggataca<br/> tcaactcttcataagaattgctacaattttgaacaatggtgctcatcaaaaaggagataaagtaactattagaactgattatcctagaataatgtaactata<br/> agaattcatctttcatctgcaatttcgtaaaatatttattgttctgatcatggttgacataaagcaatgtattatactccttcaacaaaaattgtaagctta<br/> ttaataaatgattgatgaaaaattgtattatacttaattttcacaataaattgtaagattaaatagttgaaatacgaattactgttcaaatattgtaaaaact<br/> tcatccacaataaatcagttcattgaaaccgaaaaaaaaaaaaaaaaaaaaaaaaaaaaaa</p> |
| <p><b>Nascent polypeptide-associated<br/>complex subunit alpha</b><br/> 5' untranslated region [24 bp]<br/> CDS (25 bp-666 bp) [642 bp]<br/> 3' untranslated region [1517 bp]<br/> Poly (A) tail [30 bp]<br/> Total [2213 bp]</p> | <p>ctgaaatcttcattttcataaaaatgccaagaacagaactgataaaccagccccactttgacggaagttaaaatgatgcatcagggacggagtca<br/> gattccgacgactcaattcctgagctggaggaggaccacaaaaggagcctccgatggtccaggatcatccattgcgttggggaaggagctcctattgat<br/> ggtagcagaagccaacaatctcgtggagaaaagaaggctcgaataatattggaagctggcctcaaccgatcccaggagtctcaagagtacaat<br/> ccgcaaatccaagaatattctctcgtaatcaacaaccagacgttttcgaaatcctgcatccgatactacattgtttcggtagaagccaagattgaagatc<br/> tggacaacaagcgaagttgctgcagccgaaaaattcaagccctgaaattccgagctgcagaggctggaggtagtctgctggtgacacctata<br/> caagaggaaagcgaagaagtcgatgagaccggcgttgaagacaaggatgttattggtgatgtctcaggcgaacgtcagtcaggaaaagcaat<br/> caaggctcttcgaaacaataagaacgacatcgtaaatgcaatcatggaactcaccatataagagtggttggatccgagtcgaagtgtcggatcagggtttca<br/> atttatcgagtggtttcattcttactatgatgttattattctgtgtgtaaaagactctatcgaataactattcactaattctctcaaaagaaaatctac<br/> gaatttaaaagcgtgtaccaagaatagtttctgttttgaataatagaacatgttatcggtagccaatataactaaaacgtattacatctgaggat</p>                                                                                                                                                                                                                                                                                                                                                                                                                                                                                                                             |

|                                                                                                                                                                                                         |                                                                                                                                                                                                                                                                                                                                                                                                                                                                                                                                                                                                                                                                                                                                                                                                                                                                                                                                                                                                                                                                                                                                                                                                                                                                                                                                                                |
|---------------------------------------------------------------------------------------------------------------------------------------------------------------------------------------------------------|----------------------------------------------------------------------------------------------------------------------------------------------------------------------------------------------------------------------------------------------------------------------------------------------------------------------------------------------------------------------------------------------------------------------------------------------------------------------------------------------------------------------------------------------------------------------------------------------------------------------------------------------------------------------------------------------------------------------------------------------------------------------------------------------------------------------------------------------------------------------------------------------------------------------------------------------------------------------------------------------------------------------------------------------------------------------------------------------------------------------------------------------------------------------------------------------------------------------------------------------------------------------------------------------------------------------------------------------------------------|
|                                                                                                                                                                                                         | <p>gatttattttgtccaatatttatatgattacattatcttactgattfctcatcaagtgaaaatfcagtaattcaaaagcatgtactaagaaaatatttccattctctg<br/> tctagaataaaaaaagcgttatcgttgatgttgaggcttagtatactcaacatctttacacctaactttgattttttaaaaatactttatgatcataggctacta<br/> ttttacgtaatctctcatcaagaaaaaataagtcacgtttttaaaagcgagaactggataagtttggagttcttgtttagtttgcagttcaaatgtaaaatg<br/> agttatcagtatagcctagtagattgaagattgcattttggctaggtacgctggttggtcacgggttgattctcattcctcttggaaatccggagcctcctca<br/> gaccaggaggtatctggcaatcgaatgtatgtgaaatgttacagaagatcattcttctgtttaccatagtttaattttgaaaataggcctacacctgta<br/> gataattttgtttaaaagtgtagcagctcgtgaatcaacctcactcagttatatttccacatgtcccattctgttatactttgtctgtgggtgatgccacatggg<br/> ctccttggcctgtgtgtgggtaatgagagggatgatgatgagagatgacgactactttttagcagctctggaccgacggcctatcgtcttctcctaaatggf<br/> catctgaatatttttaatacatttaatacttacttcaatctcaaaatccatagttcgttttttttttttttttttttttttttttttttttttttttttt<br/> cttcttcttcttctcgtggcctacagctcaaatcagccctggcctcctcagcctgaggtgaaatcctcaaaatctctgtttaaatttagaatttaactctgtt<br/> gaaccaattgttatccaacaggcattattcatagattcttttaagattctctgtatagtagaatccaatatagaatgggaatcgaaccaactattagattaa<br/> gttgtgagccctgtctactgggtatatactagattatattttctagtactgcgtttcaattattacaattgtatattgttattcatgttgataactataattgtaag<br/> agtgaactatagtttaataataaatcatttctgttctgttttttttttttttttttttttttttttttttttttttttttttttttttttttttttttttt</p> |
| <p><b>ATP synthase lipid-binding protein</b><br/> 5' untranslated region [46 bp]<br/> CDS (47-469 bp) [423 bp]<br/> 3' untranslated region [598 bp]<br/> Poly (A) tail [30 bp]<br/> Total [1097 bp]</p> | <p>ggagttcgtcgtcgtgcaagaaaacccaactccaaactccaaaatgtactcaaacattgcaagaattgtggcccagctgcccgatctgcttgggtatc<br/> aggatcaagagcctacgtgaggccactgagcagttcagtggtgcacaccaccgcttcaactcacagaatacacagagcactccaaccgttagttgttac<br/> ccgccgaaggaactccaacactcagctgtcgcgcgatattgactcagctgccaaatcctcgggtgccggagccgccaccgttgagtcgctggctc<br/> aggagccggaatcggaacagtggtcggctcgtgatcagctgacgccaggaatcctcagctcaagcagcagctgttctcttacgccattctgggattcg<br/> ccctgtccgagccatgggtctctctgtcttatgatggccttctcgtctgttctgctttc<b>taaac</b>agcatttctacatttagttgattacaaaaataagataatta<br/> taaattgaaaaacagaacaggactacactgccacttgggggtgatttaaaaccaggtcgcgatatttctatttaaaagggtgttggtagcaggagtggtt<br/> acggcgaaacgatcagggtcgtatattcagctatcgtatattatcagctagttggggccttcacattagtggtgaatatcgaacgatgttgggttaatt<br/> ggggcaaaccttccatcgaactcttacacaaaacatcggctcaccacgggtgaaactcctagatttaagttcatccctcctcagcaataataagctt<br/> acaagctagatgaagaaacaattccatcaatgtttattatgttactagttgtacttctcaaaaaatttaataattgtaattttcatcatctatccgggatga<br/> gttgttgacattacaatgctattgaactcaattttgtataaaaaatcggctttattatcgtcttaattgttcttttgaacttggatgatatgacgcgagagaca<br/> ttccattgtgtacagtttagagtaaaaaaaaaaaaaaaaaaaaaaaaaaaaaaaaa</p>                                                                                                                                                                                        |

**Supplemental Table S2: Primers used in this study**

| <b>Primer name</b>                                    | <b>Primer sequence</b>                           |
|-------------------------------------------------------|--------------------------------------------------|
| <b><u>Yeast two-hybrid</u></b>                        |                                                  |
| SRBSDV-P10-F:                                         | 5'- ATTAACAAGGCCATTACGGCCATGGCTGACATAAGACTTGA-3' |
| SRBSDV-P10-R:                                         | 5'-AACTGATTGGCCGAGGCGGCCCTCTGGTGACTTTATTAA-3'    |
| pPR3N-F                                               | 5'-GTCGAAAATTCAAGACAAGG3'                        |
| pPR3N-R                                               | 5'-AAGCGTGACATAACTAATTAC3'                       |
| M13-F                                                 | 5'-CGCCAGGGTTTTCCCAGTCACGAC-3'                   |
| M13-R                                                 | 5'-AGCGGATAACAATTCACACAGGA-3'                    |
| <b><u>Full-length gene sequence amplification</u></b> |                                                  |
| <b>Vesicle-associated membrane protein 7</b>          |                                                  |
| GSP-1                                                 | 5'-AACCGTACAGGTGATT-3'                           |
| GSP-2                                                 | 5'-TAGTTGCTCGGAATGTGA-3'                         |
| GSP-3                                                 | 5'-ATCCAATTCGCCATGTAC-3'                         |
| <b>Vesicle transport V-SNARE protein Vti1a</b>        |                                                  |
| GSP-1                                                 | 5'- ATCACGACCACAAGG-3'                           |
| GSP-2                                                 | 5'-GATTTCTGTATCGTTTCCCTCT-3'                     |
| GSP-3                                                 | 5'-GATAGCCAGCAGTCAATTTCTT-3'                     |
| <b>Growth hormone-inducible transmembrane protein</b> |                                                  |
| GSP-1                                                 | 5'-TAAAGGCTGATGGAGTA-3'                          |
| GSP-2                                                 | 5'-CAACGACAGCCCACCCACTA-3'                       |
| GSP-3                                                 | 5'-CCAATCATCGCAGCCAAACT-3'                       |

---

**Nascent polypeptide-associated complex subunit alpha**

GSP-1 5'-TTCTTCGTCGCTTTCC-3'  
GSP-2 5'-ATCTTCAATCTTGGCTTCACC-3'  
GSP-3 5'-ATTCTTGGATTTGCGGATTG-3'

**ATP synthase lipid-binding protein**

GSP-1 5'-GCTTGAGCGATGGATT-3'  
GSP-2 5'-TACGGCGGGTAACAAACT-3'  
GSP-3 5'-GGCGGGTAACAAACTAACG-3'

**GST Pull-down assay**

pGEX+P10-F 5'-CGCGGATCCATGGCTGACATAAGACTTGA-3'  
pGEX+P10-R 5'-CCGCTCGAGCATCTGGTGACTTTATTTAA-3'  
pCold+VAMP7-F 5'-CGCGGATCCATGCTTATCCTATACAGTGTA -3'  
pCold+VAMP7-R 5'-CCCAAGCTTTTCAGCAACTGGACAAAGTCGA-3'  
pCold+Vti1a-F 5'-CGCGGATCCATGGCTGCTTTAATTGATGTTTA-3'  
pCold+Vti1a-R 5'-CCCAAGCTTTTATCGAGAGCGAGTAGCTGATA-3'  
pCold+Ghitm-F 5'-CGCGGATCCATGTTGGCCTCACGACTTTGTA-3'  
pCold+Ghitm-R 5'-CCCAAGCTTTTATCTCCTTTTTTGATGAGCCA-3'  
pCold+ Nascent-F 5'-CGCGGATCCATGCCAGAAGCAACAGAACTTGA-3'  
pCold+ Nascent-R 5'-CCCAAGCTTTTCATATGGTGAGTTCCATGA-3'  
pCold+ ATPase-F 5'-CGCGGATCCATGTA CTCAAACATTGCAAG-3'  
pCold+ATPase-R 5'-CCCAAGCTTTAGAAAGCGAACAAGAGCAG-3'

**Gene expression analysis (RT-qPCR)**

qVAMP-7-F 5'-ACAGAACAAATCCTGGCGAAAA-3'  
qVAMP-7-R 5'-CAAACATCATCCGCAATACA-3'  
q Vti1a-F 5'-CGCAGAGGGAAACGATACA-3'

---

---

q Vti1a-R

5'-ACCACAAGGCAGAACACGA-3'

q Ghitm-F

5'-GTAGTGGGTGGGCTGTCGTT-3'

q Ghitm-R

5'-GCCGTAAAGGCTGATGGAGT-3'

---

**Supplementary Fig.1: GST Pull-down analysis of the interaction between SRBSDV-P10 and WBPB protein by Western blot**

**(A)**

1: Protein Ladder

2: VAMP7-His (39.7 kDa) (Input)

3: VAMP7-His + GST (Pull-down = Negative control)

4: VAMP7-His + P10-GST (Pull-down)

(VAMP7-His = 39.7 kDa)

5: Protein Ladder

6: Vti1A-His (39.7 kDa) (Input)

7: Vti1A-His + GST (Pull-down = Negative control)

8: Vti1A-His + P10-GST (Pull-down)

(Vti1A -His = 40.4 kDa)

9: Protein Ladder

10: Ghitm-His (51 kDa) (Input)

11: Ghitm-His + GST (Pull-down = Negative control)

12: Ghitm-His + P-10-GST (Pull-down)

(Ghitm-His = 51 kDa)

**(B)**

Lane

1: Protein Ladder

2: Nascent polypeptide-associated complex subunit alpha-His (37.5 kDa) (Input)

3: Nascent polypeptide-associated complex subunit alpha-His + GST (Pull-down = Negative control)

4: Nascent polypeptide-associated complex subunit alpha-His + P10-GST (Pull-down)

5: Protein Ladder

6: ATP synthase lipid-binding protein-His (29.4 kDa) (Input)

7: ATP synthase lipid-binding protein-His + GST (Pull-down = Negative control)

8: ATP synthase lipid-binding protein-His + P10-GST (Pull-down)



**A**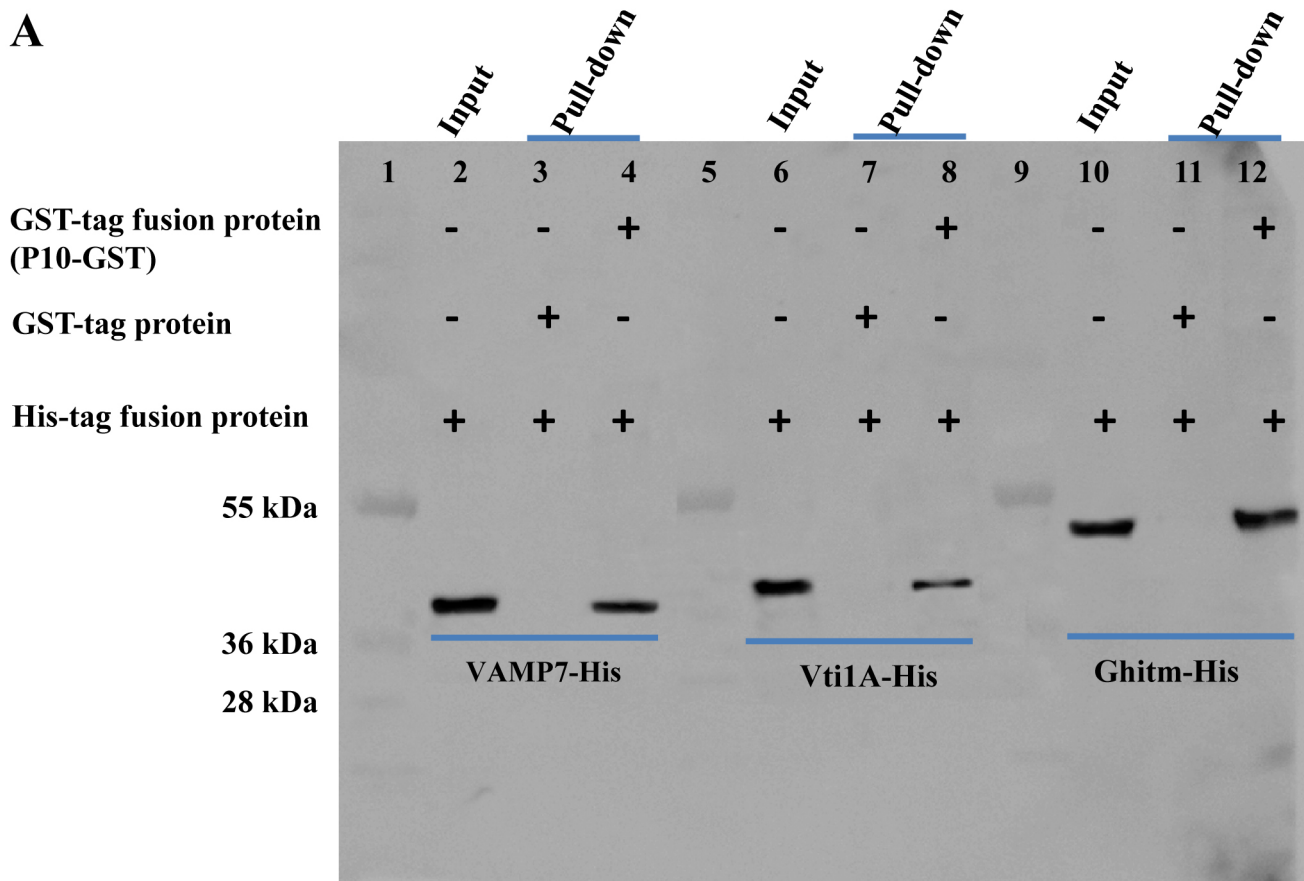

**B**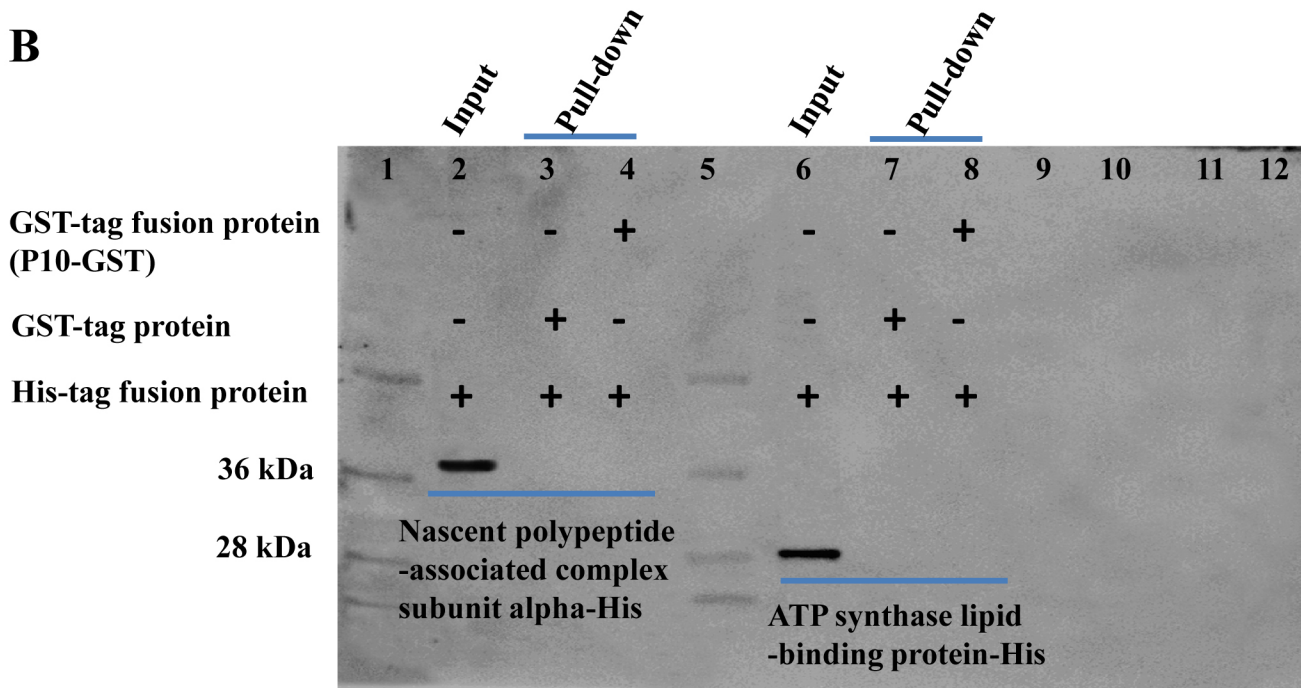

Supplement: srep32445-s1.pdf [file srep32445-s1.pdf]
